# Supplementary material
Source: Springer Nature journal article supplement (https://www.springermedizin.de/resource/supplementary/13054_2012_1048_MOESM5_ESM.pdf/9709882)

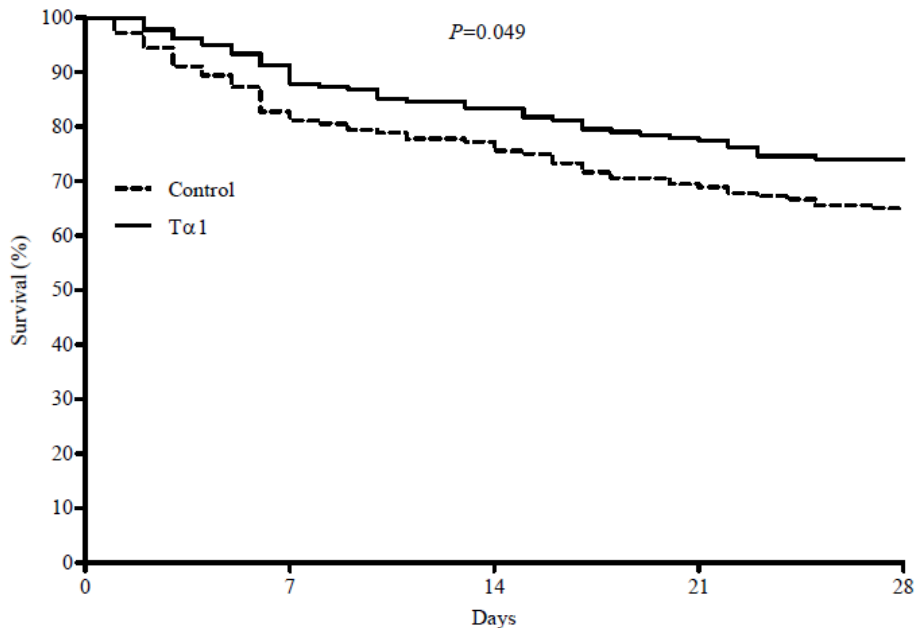

Numbers at risk

| Day     | 0   | 7   | 14  | 21  | 28  |
|---------|-----|-----|-----|-----|-----|
| Control | 180 | 149 | 139 | 125 | 117 |
| Tα1     | 181 | 165 | 151 | 141 | 134 |

Supplement: MOESM5 [file 9709882]
